# Supplementary material for: Predicting low cognitive ability at age 5 years using perinatal data and machine learning
Source: PubMed Central journal article supplement (PMC11126385; doi:10.1038/s41390-023-02914-6), 2024-01-04
Supplement: 41390_2023_2914_MOESM1_ESM.pdf [file 41390_2023_2914_MOESM1_ESM.pdf]

## Supplementary material

### Text

#### Evaluation Metrics

$$\text{Sensitivity} = \frac{TP}{TP+FN}$$

$$\text{Specificity} = \frac{TN}{TN+FP}$$

$$\text{Accuracy} = \frac{TP+TN}{TP+FP+TN+FN}$$

$$\frac{TN}{TN + FP}$$

## Supplementary Figure Legends

### Figure S1. Flowchart of study population in Growing Up in Ireland (GUI) study

This figure shows the number of participants at each wave of the GUI study. Shown in the boxes to the right are the number invited to participate at each wave, and the reasons for non-participation.

### Figure S2. Framework for feature selection

This figure demonstrates the theoretical framework used to identify potential features in the Growing Up in Ireland dataset. All features considered in the feature selection process are shown.

### Figure S3. Receiver operating characteristic curves of Models 1-3

This figure shows the receiver operating characteristic curves for prediction of low cognitive ability at age 5 for Random Forest Model 1 (8 features), Model 2 (15 features), Model 3 (23 features). Model 3 achieved the highest area under the curve (AUC) of 0.776.

### Figure S4. Overview of modelling process for cognitive ability $\geq 1SD$ below mean

This figure shows the modelling process and numbers involved at each stage of modelling using an alternative cut off point of a general cognitive ability score  $\geq 1SD$  below mean. Those below the cut-off were categorised as below average cognitive ability (BACA).

Figure S1. Flowchart of study population in Growing Up in Ireland (GUI) study

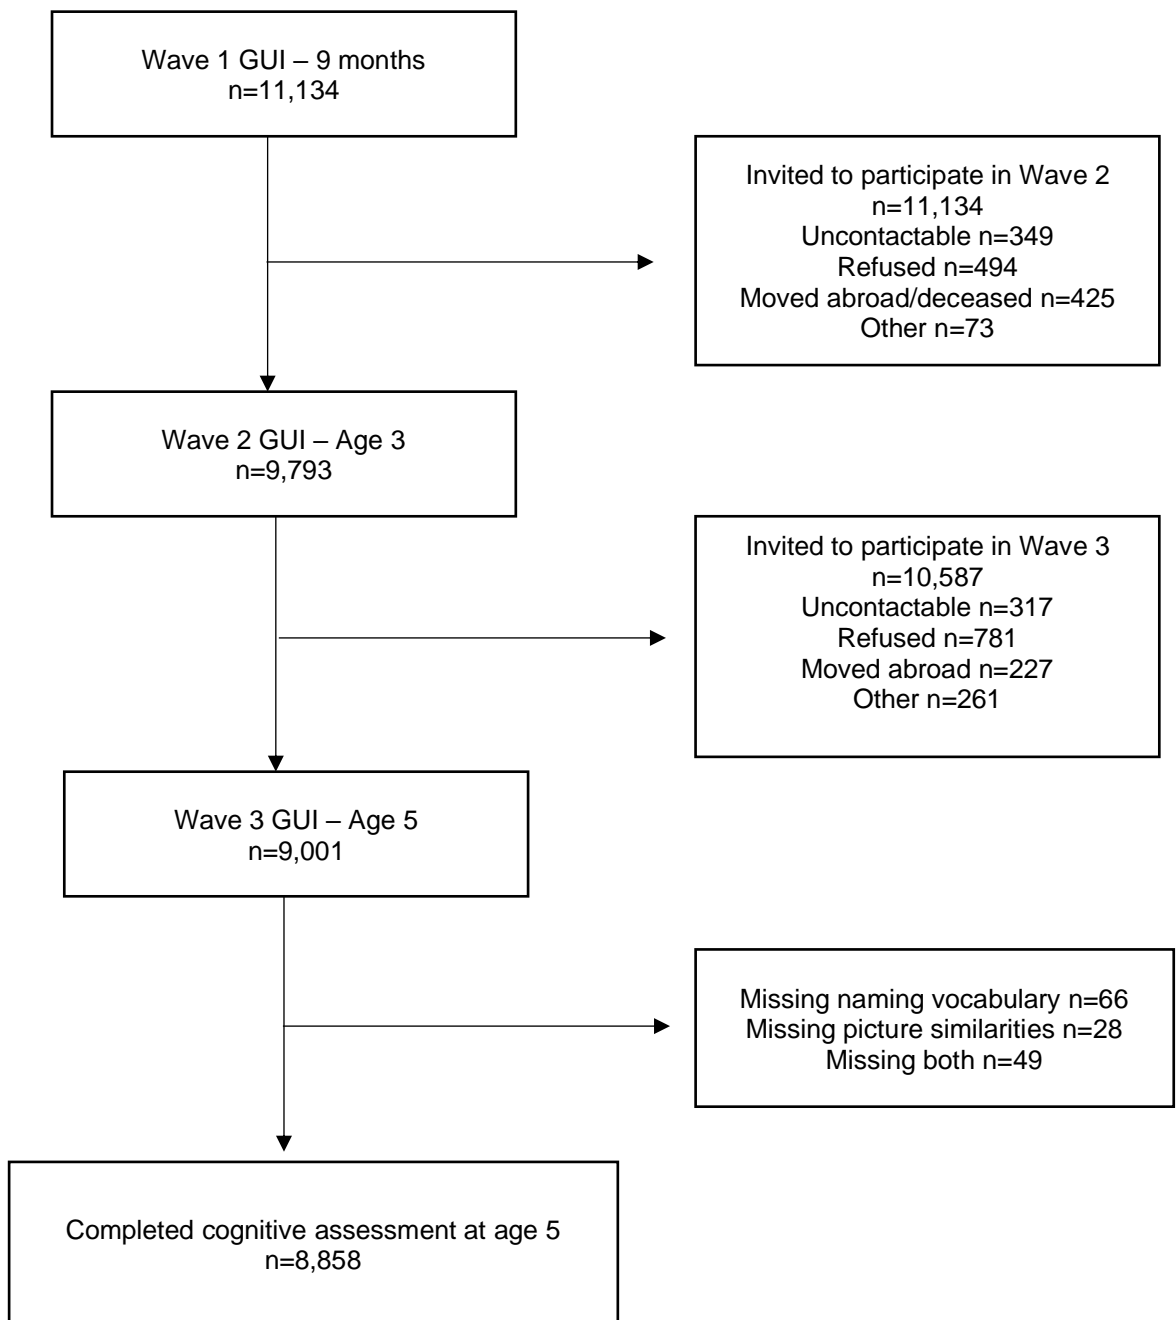

Figure S2. Framework for feature selection

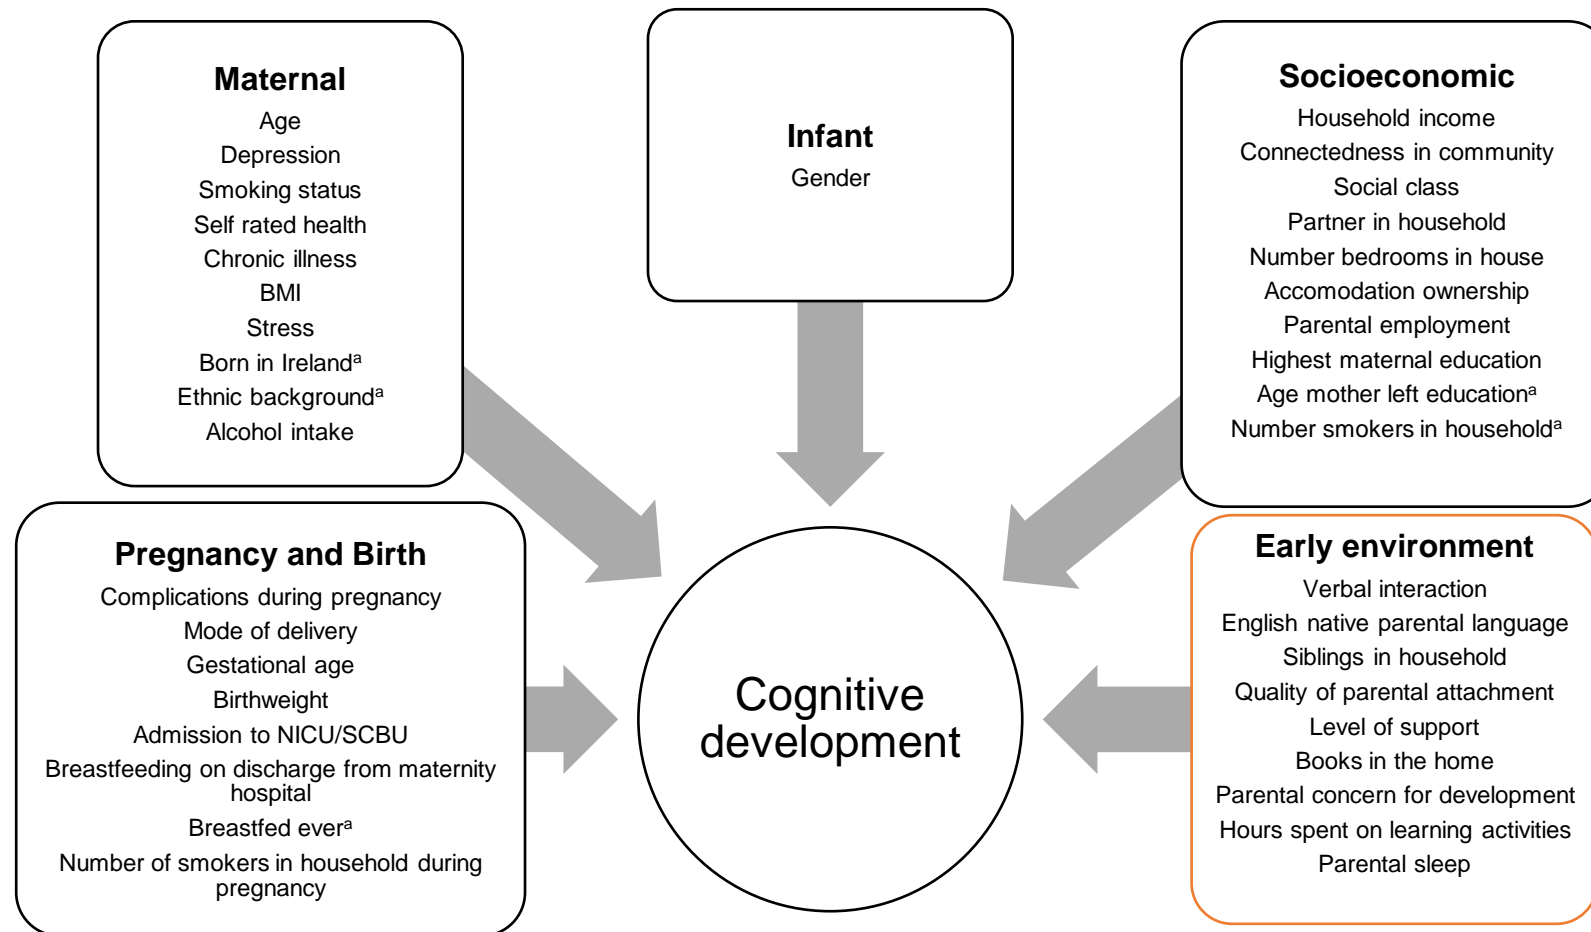

<sup>a</sup>Feature removed after examining correlations for redundancy

Figure S3. Receiver operating characteristic curves of Models 1-3

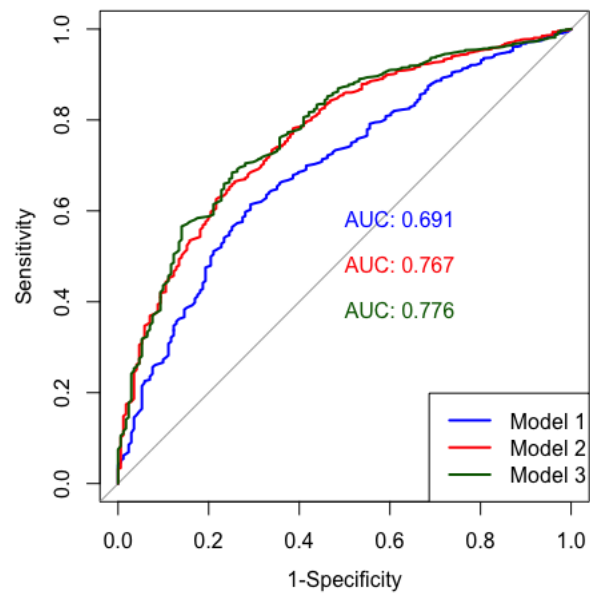

Table S1. Subtests of the British Ability Scales Second Edition Early Years Battery<sup>21,61</sup>

| <b>Name of Scale</b>       | <b>Ability being tested</b>                      |
|----------------------------|--------------------------------------------------|
| Naming vocabulary          | Expressive verbal knowledge                      |
| Picture similarities       | Non-verbal reasoning                             |
| Verbal comprehension       | Receptive verbal knowledge                       |
| Early number concepts      | Quantitative knowledge reasoning                 |
| Block building             | Perceptual motor ability                         |
| Pattern construction       | Spatial problem solving                          |
| Copying                    | Perceptual motor ability                         |
| Matching letter-like forms | Visual perceptual matching                       |
| Recall of digits forward   | Short term auditory memory                       |
| Recall of objects          | Short and intermediate term visual verbal memory |
| Recognition of pictures    | Short term visual memory                         |

<sup>a</sup> The total number of subtests administered is dependent on the age of the child being tested and ranges between 8-11 for children age 3 years 6 months – 5 years 11 months. The core subtests produce a measure of verbal ability (naming vocabulary and verbal comprehension), non-verbal ability (picture similarities and block building), and spatial ability (pattern construction and copying).

Table S2. Description of features considered in feature selection process

| Feature number | Feature                                                                       | Details                                                                  | Type                                  |
|----------------|-------------------------------------------------------------------------------|--------------------------------------------------------------------------|---------------------------------------|
|                | <b>Pregnancy and birth</b>                                                    |                                                                          |                                       |
| 1              | Hypertension                                                                  | Yes, No                                                                  | Factor                                |
| 2              | Pre-eclampsia                                                                 | Yes, No                                                                  | Factor                                |
| 3              | Urinary tract infection                                                       | Yes, No                                                                  | Factor                                |
| 4              | Persistent nausea and vomiting                                                | Yes, No                                                                  | Factor                                |
| 5              | Gestational diabetes (controlled by diet)                                     | Yes, No                                                                  | Factor                                |
| 6              | Gestational diabetes (controlled by insulin)                                  | Yes, No                                                                  | Factor                                |
| 7              | Bleeding late pregnancy                                                       | Yes, No                                                                  | Factor                                |
| 8              | Vaginal infection                                                             | Yes, No                                                                  | Factor                                |
| 9              | Intrauterine growth restriction                                               | Yes, No                                                                  | Factor                                |
| 10             | Mode delivery                                                                 | Normal, forceps/suction assisted, planned c-section, emergency c-section | Factor                                |
| 11             | Gestational age                                                               | Gestational age in weeks                                                 | Numeric                               |
| 12             | Birthweight category                                                          | <1500g, 1500-2000g, 2500-4500g, >4500g                                   | Ordinal. Treated as numeric in model. |
| 13             | Required neonatal intensive care unit (NICU) or special care baby unit (SCBU) | Yes, No                                                                  | Factor                                |
| 14             | Breastfed on discharge from hospital                                          | Yes, No                                                                  | Factor                                |
| 15             | Number of people who smoked in household during pregnancy                     | Numeric (response of 5 = 5 or more)                                      | Numeric                               |
|                | <b>Maternal</b>                                                               |                                                                          |                                       |
| 16             | Age                                                                           | Age of PCG when infant age 9 months (response 40 = 40 or more years)     | Numeric                               |
| 17             | Body mass index                                                               | Weight in kg/height m <sup>2</sup> derived from measured data            | Numeric                               |
| 18             | Self-rated health                                                             | Excellent, very good, good, fair, poor                                   | Ordinal. Treated as numeric in model  |
| 19             | Depression score                                                              | Centre for Epidemiological Studies Depression Scale (short version)      | Numeric                               |
| 20             | Chronic illness (includes physical, mental, disability)                       | Yes, No                                                                  | Factor                                |
| 21             | Current smoker (daily or occasionally)                                        | Yes, No                                                                  | Factor                                |

|    |                                         |                                                                                                                                                                                                                                             |                                          |
|----|-----------------------------------------|---------------------------------------------------------------------------------------------------------------------------------------------------------------------------------------------------------------------------------------------|------------------------------------------|
| 22 | Alcohol intake                          | Never (1), less than once a month (2), 1-2/month (3), 1-2 times/week (4), 3-4 times/week (5), 5-6 times/week (6), daily (7)                                                                                                                 | Ordinal.<br>Treated as numeric in model. |
| 23 | Stress                                  | Parental stress scale                                                                                                                                                                                                                       | Numeric                                  |
| 24 | Born in Ireland                         | Yes, No                                                                                                                                                                                                                                     | Factor                                   |
| 25 | Ethnic background                       | Irish, any other white background, African or any other Black background, Chinese or any other Asian background, Other                                                                                                                      | Factor                                   |
| 26 | Infant                                  |                                                                                                                                                                                                                                             |                                          |
| 27 | Infant gender                           | Male, Female                                                                                                                                                                                                                                | Factor                                   |
|    | <b>Socioeconomic</b>                    |                                                                                                                                                                                                                                             |                                          |
| 28 | Number of bedrooms                      | Number of separate bedrooms in accommodation                                                                                                                                                                                                | Numeric                                  |
| 29 | Number in household who currently smoke | Number who currently smoke (response of 6 = 6 or more)                                                                                                                                                                                      | Numeric                                  |
| 30 | Accommodation ownership                 | Owner occupied (with or without mortgage), being purchased from a local authority, rented from a local authority, rented from a voluntary body, rented from private landlord, living with and paying rent to parents, occupied free of rent | Factor                                   |
| 31 | PCG employment status                   | Employee, self-employed, farmer, student full-time, state training scheme, unemployed actively looking for job, long-term sickness or disability, home duties, retired, other                                                               | Factor                                   |
| 32 | Household equivalised income            | Calculated as disposable household income divided by equivalised household size.                                                                                                                                                            | Numeric                                  |
| 33 | PCG highest education                   | Primary or less, lower secondary, upper secondary, technical/Vocational, non-degree, degree or equivalent, post degree                                                                                                                      | Ordinal.<br>Treated as numeric in model. |



|    |                                                        |                                                                                                                                                                                                                                                                                             |                                       |
|----|--------------------------------------------------------|---------------------------------------------------------------------------------------------------------------------------------------------------------------------------------------------------------------------------------------------------------------------------------------------|---------------------------------------|
|    |                                                        | cert/diploma, postgrad masters or PhD                                                                                                                                                                                                                                                       |                                       |
| 34 | Family's social class                                  | Highest social class category of both parents in family (where relevant) based on their occupation. Professional workers (1), managerial and technical (2), non-manual (3), skilled manual (4), semi-skilled (5), unskilled (6), all others gainfully occupied (7), never worked at all (8) | Ordinal. Treated as numeric in model. |
| 35 | Connectedness in community                             | As a family are settled and part of community – Strongly agree, Agree, Disagree, Strongly disagree                                                                                                                                                                                          | Ordinal. Treated as numeric in model  |
|    | <b>Early environment</b>                               |                                                                                                                                                                                                                                                                                             |                                       |
| 36 | Siblings                                               | Brothers or sisters living in household. Yes, No.                                                                                                                                                                                                                                           | Factor                                |
| 37 | Parental sleep                                         | Average hours of sleep nightly. Numeric (response of 3 = 3 or less)                                                                                                                                                                                                                         | Numeric                               |
| 38 | Verbal interaction with baby                           | Parent talks to baby when busy doing things - Never, rarely, sometimes, often, always                                                                                                                                                                                                       | Ordinal. Treated as numeric in model. |
| 39 | Native language of primary care giver (PCG) is English | Yes, No                                                                                                                                                                                                                                                                                     | Factor                                |
| 40 | Quality of parental attachment (PCG)                   | The Quality of Attachment subscale from the Maternal Postnatal Attachment Scale                                                                                                                                                                                                             | Numeric                               |
| 41 | Level of PCG support                                   | I get enough help, I don't get enough help, I don't get any help at all, I don't need any help, Family not living in the country                                                                                                                                                            | Factor                                |
| 42 | Books in the home                                      | How many children's books does child have access to in the home now, including any library books – None, <10, 10-20, 21-30, >30                                                                                                                                                             | Factor                                |

|    |                                    |                                                                                                     |         |
|----|------------------------------------|-----------------------------------------------------------------------------------------------------|---------|
| 43 | Reading                            | Days per week someone reads to child in the home                                                    | Numeric |
| 44 | Alphabet                           | Days per week someone does alphabet with child in the home                                          | Numeric |
| 45 | Numeracy                           | Days per week someone does numbers or counting with child in the home                               | Numeric |
| 46 | Music                              | Days per week someone does songs, poems, or nursery rhymes with child in the home                   | Numeric |
| 47 | Games                              | Days per week someone play games (board games, jigsaws, card games etc) with child in the home      | Numeric |
| 48 | Art                                | Days per week someone paints, draws, colours, or plays with play-doh at home with child in the home | Numeric |
| 49 | Active play                        | Days per week someone plays active games with child (e.g. football)                                 | Numeric |
| 50 | Hours spent on learning activities | Sum of items 51-57                                                                                  | Numeric |

All features (excluding features 42-50\*) were measured at the 9-month questionnaire which was a self-complete questionnaire completed by the child's primary caregiver which in 99.7% of cases was the child's mother. \*Features 42-50 were measured at the 3-year questionnaire.

Table S3. Feature sets used in Recursive Feature Elimination process

|                     | Feature set 1                                                                 | Feature set 2                                                                                                                                                                                                                                                                                                                                                                                                                                                                                   | Feature set 3                                                                                                                                                                                                                                                                                                                                                                                                                                                        |
|---------------------|-------------------------------------------------------------------------------|-------------------------------------------------------------------------------------------------------------------------------------------------------------------------------------------------------------------------------------------------------------------------------------------------------------------------------------------------------------------------------------------------------------------------------------------------------------------------------------------------|----------------------------------------------------------------------------------------------------------------------------------------------------------------------------------------------------------------------------------------------------------------------------------------------------------------------------------------------------------------------------------------------------------------------------------------------------------------------|
| Pregnancy and Birth | Gestational age*<br>Admission to NICU/SCBU                                    | Hypertension<br>Pre-eclampsia<br>Urinary tract infection<br>Persistent nausea/vomiting<br>Gestational diabetes (controlled by diet)<br>Gestational diabetes (controlled by insulin)<br>Bleeding late pregnancy<br>Vaginal infection<br>Intrauterine growth restriction<br>Mode of delivery<br>Gestational age*<br>Birthweight category*<br>Admission to NICU <sup>a</sup> /SCBU <sup>b</sup><br>Number in household smoking during pregnancy*<br>Breastfed on discharge from maternity hospital | Hypertension<br>Pre-eclampsia<br>Urinary tract infection<br>Persistent nausea/vomiting<br>Gestational diabetes(controlled by diet)*<br>Gestational diabetes (controlled by insulin)<br>Bleeding late pregnancy<br>Vaginal infection<br>Intrauterine growth restriction<br>Mode of delivery<br>Gestational age*<br>Birthweight category*<br>Admission to NICU/SCBU<br>Number in household smoking during pregnancy*<br>Breastfed on discharge from maternity hospital |
| Maternal            | BMI*<br>Highest level of education*<br>Depression*<br>Alcohol intake*<br>Age* | BMI*<br>Highest level of education*<br>Depression*<br>Alcohol intake*<br>Age*<br>Self-rated health*<br>Chronic illness<br>Smoking status                                                                                                                                                                                                                                                                                                                                                        | BMI*<br>Highest level of education*<br>Depression*<br>Alcohol intake*<br>Age*<br>Self-rated health*<br>Chronic illness<br>Smoking status<br>Stress*                                                                                                                                                                                                                                                                                                                  |
| Infant              | Gender                                                                        | Gender                                                                                                                                                                                                                                                                                                                                                                                                                                                                                          | Gender                                                                                                                                                                                                                                                                                                                                                                                                                                                               |
| Socioeconomic       | Household social class*<br>Household income*<br>Partner in household          | Household social class*<br>Household income*<br>Maternal employment status<br>Number of bedrooms*                                                                                                                                                                                                                                                                                                                                                                                               | Household social class*<br>Household income*<br>Maternal employment status*<br>Number of bedrooms*                                                                                                                                                                                                                                                                                                                                                                   |

|                   |  |                                                                                 |                                                                                                                                                                                                                 |
|-------------------|--|---------------------------------------------------------------------------------|-----------------------------------------------------------------------------------------------------------------------------------------------------------------------------------------------------------------|
|                   |  | Accommodation ownership*<br>Connectedness in community*<br>Partner in household | Accommodation ownership*<br>Connectedness in community*<br>Partner in household                                                                                                                                 |
| Early environment |  | Siblings<br>English is maternal native language*                                | Siblings<br>English is maternal native language*<br>Books in the home*<br>Hours spent on learning activities*<br>Verbal interaction*<br>Parental sleep*<br>Level of support*<br>Quality of parental attachment* |

\*Selected in recursive feature elimination for final model; <sup>a</sup>Neonatal intensive care unit; <sup>b</sup>Special care baby unit

Table S4. Pregnancy, maternal, infant, socioeconomic and early environment characteristics of study population

| Characteristics                                 | Total        | Low<br>n=573 (6.5%) | Other<br>n=8,285 (93.5%) | p-value             |
|-------------------------------------------------|--------------|---------------------|--------------------------|---------------------|
| <b><u>Pregnancy and Birth</u></b>               |              |                     |                          |                     |
| <b>Mode of delivery</b>                         |              |                     |                          |                     |
| Normal vaginal                                  | 5,239 (59.1) | 367 (64.0)          | 4,875 (58.8)             |                     |
| Forceps/suction assisted                        | 1,299 (14.7) | 60 (10.5)           | 1,238 (14.9)             |                     |
| Planned c-section                               | 1,151 (13.0) | 61 (10.6)           | 1,090 (13.2)             |                     |
| Emergency c-section                             | 1,169 (13.2) | 85 (14.8)           | 1,082 (13.1)             | 0.003 <sup>b</sup>  |
| Preeclampsia                                    | 620 (7.0)    | 35 (6.1)            | 585 (7.1)                | 0.436 <sup>b</sup>  |
| Gestational diabetes<br>(controlled by diet)    | 195 (2.2)    | 16 (2.8)            | 179 (2.2)                | 0.396 <sup>b</sup>  |
| Gestational diabetes<br>(controlled by insulin) | 83 (0.9)     | 3 (0.5)             | 80 (1.0)                 | 0.373 <sup>e</sup>  |
| IUGR <sup>a</sup>                               | 179 (2.0)    | 12 (2.1)            | 167 (2.0)                | 1.000 <sup>b</sup>  |
| Admission to NICU/SCBU                          | 1,217 (13.7) | 88 (15.4)           | 1,129 (13.6)             | 0.271 <sup>b</sup>  |
| Gestational age – mean (sd)                     | 39.5 (2.1)   | 39.3 (2.4)          | 39.5 (2.0)               | 0.035 <sup>c</sup>  |
| <b>Birthweight</b>                              |              |                     |                          |                     |
| <1,500g                                         | 67 (0.8)     | 6 (1.0)             | 61 (0.7)                 |                     |
| 1500g-2500g                                     | 401 (4.5)    | 38 (6.6)            | 362 (4.4)                |                     |
| 2500g-4500g                                     | 8,178 (92.3) | 509 (88.8)          | 7,670 (92.6)             |                     |
| >4500g                                          | 212 (2.4)    | 20 (3.5)            | 192 (2.3)                | 0.0138 <sup>e</sup> |
| Breastfed on discharge - yes                    | 4,131 (46.6) | 300 (52.4)          | 4,427 (53.4)             | 0.648 <sup>b</sup>  |
| Smoker in hsd smoking during<br>pregnancy - yes | 2,801 (31.6) | 225 (39.3)          | 2,576 (31.1)             | <0.001 <sup>b</sup> |
| <b><u>Maternal</u></b>                          |              |                     |                          |                     |
| Age – mean (sd)                                 | 32.0 (5.2)   | 30.6 (5.7)          | 32.1 (5.1)               | <0.001 <sup>c</sup> |
| BMI – mean (sd)                                 | 25.5 (4.7)   | 25.9 (5.0)          | 25.5 (4.7)               | 0.072 <sup>c</sup>  |
| <b>Self-rated health</b>                        |              |                     |                          |                     |
| Excellent                                       | 2,798 (31.6) | 159 (27.7)          | 2,639 (31.9)             |                     |
| Very good                                       | 3,505 (39.6) | 223 (38.9)          | 3,282 (39.6)             |                     |
| Good                                            | 2,020 (22.8) | 150 (26.2)          | 1,870 (22.6)             |                     |
| Fair                                            | 475 (5.4)    | 35 (6.1)            | 440 (5.3)                |                     |
| Poor                                            | 60 (0.6)     | 6 (1.0)             | 54 (0.7)                 | 0.097 <sup>b</sup>  |
| Current smoker - yes                            | 2,028 (22.9) | 174 (30.4)          | 1,854 (22.4)             | <0.001 <sup>b</sup> |
| <b>Alcohol intake</b>                           |              |                     |                          |                     |
| Never                                           | 1,457 (16.4) | 192 (33.5)          | 1,265 (15.3)             |                     |
| <1/month                                        | 2,409 (27.2) | 178 (31.1)          | 2,231 (26.9)             |                     |
| 1-2/month                                       | 2,398 (27.1) | 119 (20.8)          | 2,279 (27.5)             |                     |
| 1-2/week                                        | 2,176 (24.6) | 73 (12.7)           | 2,103 (25.4)             |                     |
| 3-4/week                                        | 353 (4.0)    | 10 (1.7)            | 343 (4.1)                |                     |
| 5-6/week                                        | 49 (0.6)     | <5                  | 48 (0.6)                 |                     |
| Daily                                           | 16 (0.2)     | <5                  | 16 (0.2)                 | <0.001 <sup>e</sup> |
| Maternal depression – median<br>(IQR)           | 1 (3)        | 1 (3)               | 1 (3)                    | 0.0384 <sup>d</sup> |
| Chronic illness - yes                           | 1,019 (11.5) | 55 (9.6)            | 964 (11.6)               | 0.159 <sup>b</sup>  |
| <b>Highest level of education</b>               |              |                     |                          |                     |
| Primary or less                                 | 186 (2.1)    | 43 (7.5)            | 143 (1.7)                |                     |

|                                          |                 |                 |                 |                     |
|------------------------------------------|-----------------|-----------------|-----------------|---------------------|
| Lower secondary                          | 739 (8.3)       | 77 (13.4)       | 662 (8.0)       |                     |
| Upper secondary                          | 1,608 (18.2)    | 131 (22.9)      | 1,477 (17.8)    |                     |
| Technical/vocational                     | 1,194 (13.5)    | 114 (19.9)      | 1,080 (13.0)    |                     |
| Non Degree                               | 1,787 (20.2)    | 74 (12.9)       | 1,713 (20.7)    |                     |
| Degree or equivalent                     | 1,617 (18.3)    | 68 (11.9)       | 1,549 (18.7)    |                     |
| Post degree cert/diploma                 | 1,047 (11.8)    | 36 (6.3)        | 1,011 (12.2)    |                     |
| Post degree masters or PhD               | 680 (7.7)       | 30 (5.2)        | 650 (7.8)       | <0.001 <sup>b</sup> |
| <b>Infant</b>                            |                 |                 |                 |                     |
| Infant gender - male                     | 4,479 (50.6)    | 347 (60.6)      | 4,132 (49.9)    | <0.001 <sup>b</sup> |
| <b>Socioeconomic</b>                     |                 |                 |                 |                     |
| Household income – median (IQR)          | 48,000 (33,600) | 31,200 (24,963) | 48,000 (33,330) | <0.001 <sup>d</sup> |
| <b>Household social class</b>            |                 |                 |                 |                     |
| Professional workers                     | 1,711 (19.3)    | 52 (9.1)        | 1,659 (20.0)    |                     |
| Managerial and technical                 | 2,863 (32.3)    | 109 (19.0)      | 2,754 (33.2)    |                     |
| Non-manual                               | 1,472 (16.6)    | 85 (14.8)       | 1,387 (16.7)    |                     |
| Skilled manual                           | 1,168 (13.2)    | 122 (21.3)      | 1,046 (12.6)    |                     |
| Semi-skilled                             | 638 (7.2)       | 72 (12.6)       | 566 (6.8)       |                     |
| Unskilled                                | 119 (1.3)       | 15 (2.6)        | 104 (1.3)       |                     |
| All others gainfully occupied            | 37 (0.4)        | 8 (1.4)         | 29 (0.4)        |                     |
| Never worked                             | 850 (9.6)       | 110 (19.2)      | 740 (8.9)       | <0.001 <sup>b</sup> |
| <b>Accommodation occupancy</b>           |                 |                 |                 |                     |
| Owner occupied                           | 6,315 (71.3)    | 223 (38.9)      | 6,091 (73.5)    |                     |
| Local authority housing                  | 623 (7.0)       | 85 (14.8)       | 538 (6.5)       |                     |
| Private rental                           | 1,622 (18.3)    | 249 (43.5)      | 1,374 (16.6)    |                     |
| Living with parents                      | 146 (1.6)       | 8 (1.4)         | 138 (1.7)       |                     |
| Occupied rent free                       | 152 (1.7)       | 8 (1.4)         | 144 (1.7)       | <0.001 <sup>b</sup> |
| Number of bedrooms – mean (sd)           | 3.5 (0.9)       | 3.1 (0.9)       | 3.5 (0.9)       | <0.001 <sup>c</sup> |
| <b>Connectedness in community</b>        |                 |                 |                 |                     |
| Strongly agree                           | 3,777 (42.6)    | 186 (32.5)      | 3,591 (43.3)    |                     |
| Agree                                    | 4,292 (48.5)    | 320 (55.8)      | 3,972 (47.9)    |                     |
| Disagree                                 | 618 (7.0)       | 54 (9.4)        | 564 (6.8)       |                     |
| Strongly disagree                        | 171 (1.9)       | 13 (2.3)        | 158 (1.9)       | <0.001 <sup>b</sup> |
| <b>Early environment</b>                 |                 |                 |                 |                     |
| Siblings - yes                           | 5,410 (61.1)    | 355 (62.0)      | 5,055 (61.0)    | 0.687 <sup>b</sup>  |
| <b>Books in home</b>                     |                 |                 |                 |                     |
| None                                     | 29 (0.3)        | 6 (1.0)         | 23 (0.3)        |                     |
| <10                                      | 585 (6.6)       | 111 (19.4)      | 474 (5.7)       |                     |
| 10-20                                    | 1,626 (18.4)    | 169 (29.5)      | 1,457 (17.6)    |                     |
| 21-30                                    | 1,562 (17.6)    | 105 (18.3)      | 1,457 (17.6)    |                     |
| >30                                      | 5,056 (57.1)    | 182 (31.8)      | 4,874 (58.8)    | <0.001 <sup>b</sup> |
| Hours on learning activities – mean (sd) | 34.2 (8.5)      | 31.8 (9.9)      | 34.4 (8.3)      | <0.001 <sup>c</sup> |
| <b>Level of support</b>                  |                 |                 |                 |                     |
| Get enough                               | 6,446 (72.8)    | 344 (60.0)      | 6,102 (73.7)    |                     |
| Don't get enough                         | 856 (9.7)       | 49 (8.6)        | 807 (9.7)       |                     |
| Don't get any                            | 482 (5.4)       | 36 (6.3)        | 446 (5.4)       |                     |
| Don't need any                           | 458 (5.2)       | 51 (8.9)        | 407 (4.9)       |                     |
| Family not in country                    | 616 (7.0)       | 93 (16.2)       | 523 (6.3)       | <0.001 <sup>b</sup> |

|                                                                  |              |            |              |                     |
|------------------------------------------------------------------|--------------|------------|--------------|---------------------|
| Quality of parental attachment – median (IQR)                    | 44 (4)       | 44 (4)     | 44 (4)       | 0.529 <sup>d</sup>  |
| Parental sleep hours/night – median (IQR)                        | 11 (2)       | 10 (1)     | 11 (2)       | <0.001 <sup>d</sup> |
| English maternal native language – yes                           | 7,512 (84.8) | 309 (53.9) | 7,203 (86.9) | <0.001 <sup>b</sup> |
| <b>Verbal interaction – talk to baby while busy doing things</b> |              |            |              |                     |
| Never                                                            | 201 (2.3)    | 16 (2.8)   | 185 (2.2)    |                     |
| Rarely                                                           | 33 (0.4)     | <5         | 30 (0.4)     |                     |
| Sometimes                                                        | 658 (7.4)    | 50 (8.7)   | 608 (7.3)    |                     |
| Often                                                            | 2,130 (24.0) | 143 (25.0) | 1,987 (24.0) |                     |
| Always                                                           | 5,836 (65.9) | 361 (63.0) | 5,475 (66.1) | 0.385 <sup>e</sup>  |
| Partner in household                                             | 7,929 (89.5) | 491 (85.7) | 7,438 (89.8) | 0.003 <sup>b</sup>  |

<sup>a</sup>Intrauterine growth restriction; <sup>b</sup>Pearson's Chi-squared test; <sup>c</sup>Welch two sample t-test; <sup>d</sup>Wilcoxon rank sum test ; <sup>e</sup>Fisher's Exact Test (p-value simulated where cell number too small);

Table S5. Average accuracy of machine learning algorithms across 10-fold cross validation on training data calculated at a decision threshold of 0.5

|                        | Model 1 (8 features) | Model 2 (15 features) | Model 3 (24 features) |
|------------------------|----------------------|-----------------------|-----------------------|
| Random forest          | 0.85 (0.02)          | 0.87 (0.02)           | 0.87 (0.03)           |
| Logistic regression    | 0.70 (0.01)          | 0.75 (0.01)           | 0.76 (0.01)           |
| Support vector machine | 0.78 (0.02)          | 0.81 (0.03)           | 0.80 (0.03)           |

Table S6. Performance of Model 2 across different decision thresholds on independent test set

| Decision threshold | Sensitivity | Specificity | Accuracy |
|--------------------|-------------|-------------|----------|
| 0.50               | 0.40        | 0.91        | 0.87     |
| 0.45               | 0.47        | 0.87        | 0.84     |
| 0.40               | 0.55        | 0.82        | 0.80     |
| 0.35               | 0.61        | 0.76        | 0.75     |
| 0.30               | 0.69        | 0.70        | 0.70     |
| 0.28 <sup>a</sup>  | 0.72        | 0.66        | 0.68     |

<sup>a</sup> Optimal cut point chosen using Youden's J statistic where the optimal cut-off is the threshold that maximises the distance to the diagonal line)

Table S7. Contingency table showing how model would perform across 60,000 births at a decision threshold of 0.5

|                   |                            | Standardised cognitive test age 5 |          |        |
|-------------------|----------------------------|-----------------------------------|----------|--------|
|                   |                            | Low                               | 'Normal' |        |
| Model predictions | Low cognitive ability      | 1,560                             | 5,610    | 7,170  |
|                   | 'Normal cognitive ability' | 2,340                             | 50,490   | 52,830 |
|                   |                            | 3,900                             | 56,100   | 60,000 |



Supplementary analysis using a cognitive ability score cut-off of >1 standard deviation below the mean to define low cognitive ability.

Figure S4. Overview of modelling process for cognitive ability > 1SD below mean (Below average cognitive ability (BACA))

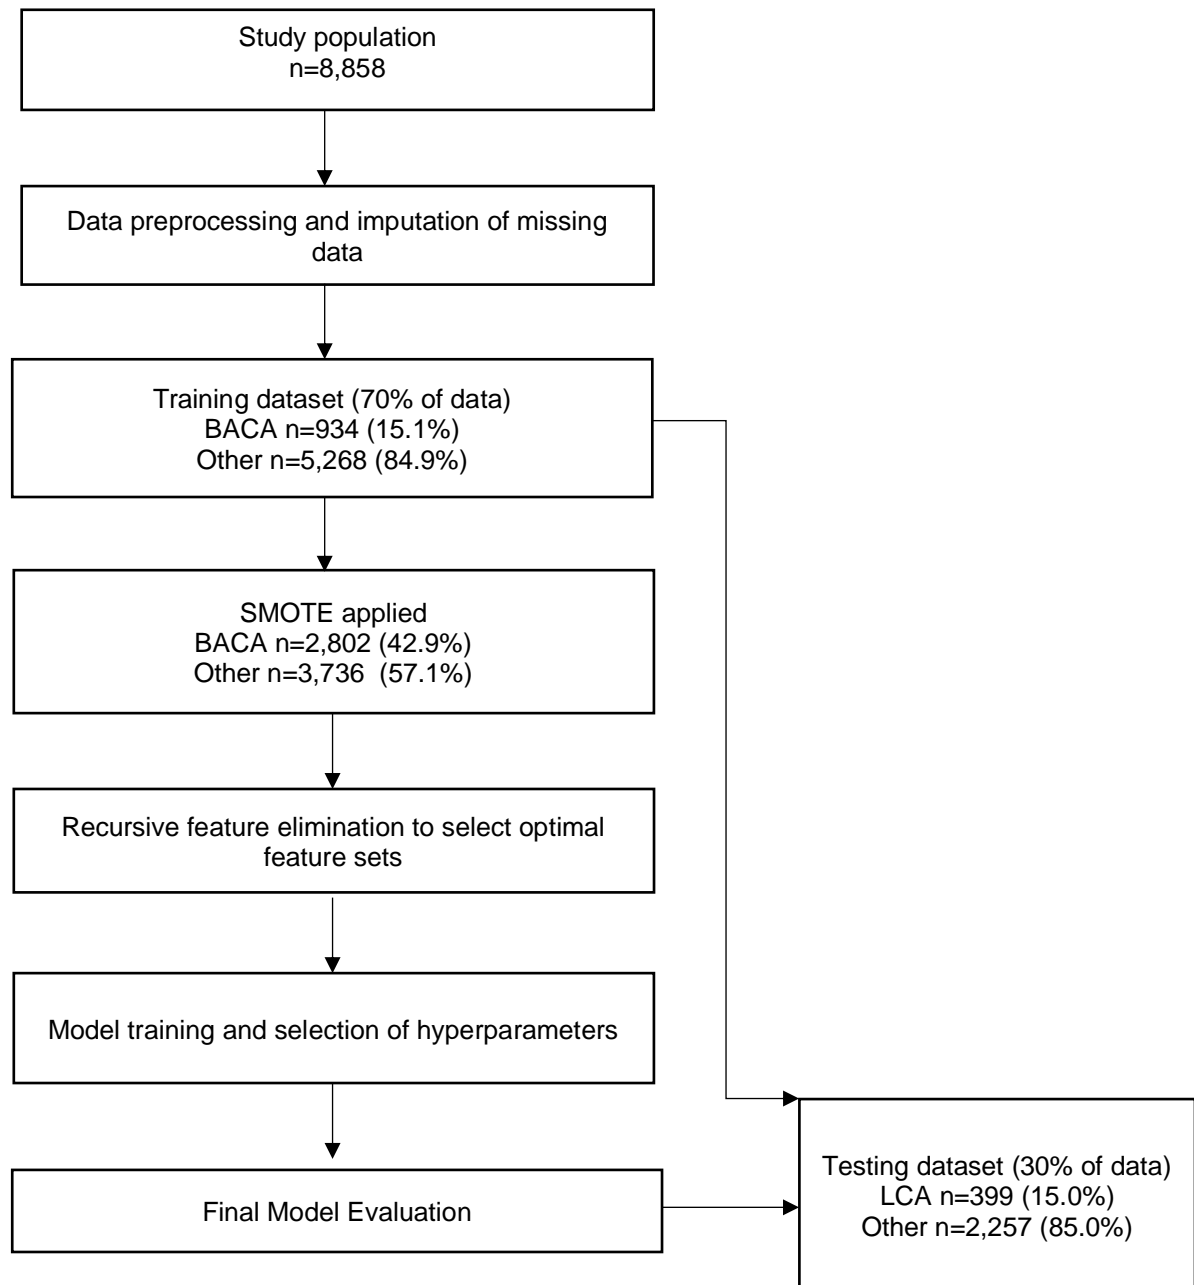

Table S8. Accuracy of different machine learning algorithms on 10-fold cross-validation for predicting cognitive ability > 1 standard deviation below mean at age 5

|                       | Model 1<br>(9 features) | Model 2<br>(18 features) | Model 3<br>(31 features) |
|-----------------------|-------------------------|--------------------------|--------------------------|
| Accuracy <sup>a</sup> |                         |                          |                          |
| Random forest         | 0.86 (0.01)             | 0.87 (0.01)              | 0.88 (0.01)              |
| Logistic regression   | 0.67 (0.01)             | 0.71 (0.01)              | 0.73 (0.01)              |
| SVM                   | 0.77 (0.01)             | 0.81 (0.02)              | 0.82 (0.02)              |

<sup>a</sup> Calculated at a decision threshold of 0.5

Table S9. Performance metrics of final models tested on independent test set for predicting cognitive ability > 1 standard deviation below mean at age 5

|                                                 | Model 1<br>(9 features) | Model 2<br>(18 features) | Model 3<br>(31 features) |
|-------------------------------------------------|-------------------------|--------------------------|--------------------------|
| Accuracy <sup>a</sup>                           | 0.82 (0.80-0.83)        | 0.82 (0.81-0.84)         | 0.82 (0.81-0.84)         |
| Sensitivity <sup>a</sup>                        | 0.22                    | 0.29                     | 0.35                     |
| Specificity <sup>a</sup>                        | 0.92                    | 0.92                     | 0.91                     |
| AUROC <sup>b</sup><br>(95% confidence interval) | 0.63 (0.60-0.66)        | 0.68 (0.65-0.71)         | 0.70 (0.66-0.72)         |
| Positive predictive value <sup>a</sup>          | 0.33                    | 0.39                     | 0.40                     |
| Negative predictive value <sup>a</sup>          | 0.87                    | 0.88                     | 0.89                     |

<sup>a</sup> Calculated at a decision threshold of 0.5, <sup>b</sup> Area under receiver operating characteristic curve

Table S10. Performance metrics of random forest models trained with the five most important socioeconomic features alone.

| Feature                    | AUROC (95% CI)   | Accuracy <sup>a</sup> | Sensitivity <sup>a</sup> | Specificity <sup>a</sup> |
|----------------------------|------------------|-----------------------|--------------------------|--------------------------|
| Household social class     | 0.56 (0.52-0.59) | 0.94 (0.93-0.94)      | 0.00                     | 1.00                     |
| PCG Highest education      | 0.55 (0.52-0.58) | 0.92 (0.91-0.93)      | 0.06                     | 0.98                     |
| Household income           | 0.64 (0.59-0.68) | 0.80 (0.78-0.81)      | 0.33                     | 0.83                     |
| Number of bedrooms in home | 0.52 (0.50-0.54) | 0.94 (0.93-0.94)      | 0.00                     | 1.00                     |
| PCG alcohol intake         | 0.62 (0.58-0.66) | 0.81 (0.79-0.82)      | 0.28                     | 0.84                     |

<sup>a</sup> Calculated at a decision threshold of 0.5
